# Supplementary material
Source: PubMed Central journal article supplement (PMC2949209)
Supplement: jcbfm201011x1.pdf [file jcbfm201011x1.pdf]

## Supplementary Figure 1

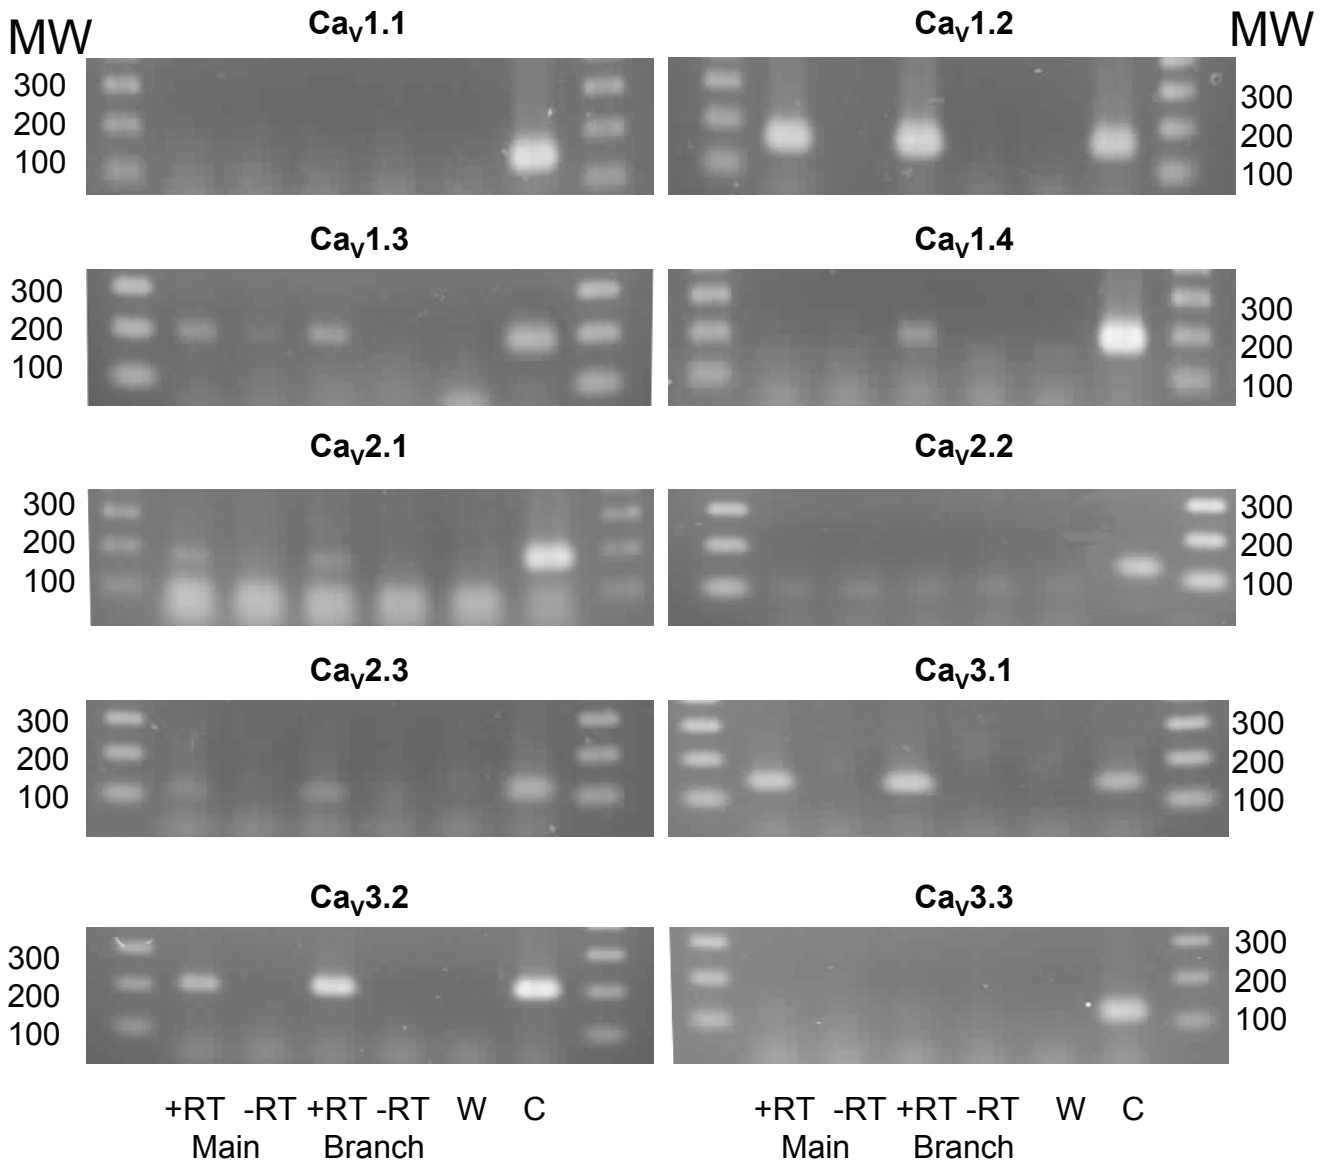

**Supplementary Figure 1: Semi-quantitative expression of VDCCs in middle cerebral artery and branches.** Lanes from left to right: Molecular weight marker (bp), Main vessel positive reverse transcription reaction, Main vessel genomic DNA contamination control, Branch vessel positive reverse transcription reaction, Branch vessel genomic DNA contamination control, Water control, Positive sample control. Positive controls: Ca<sub>v</sub>1.1: skeletal muscle, 1.2: hippocampus, 1.3: olfactory bulb, 1.4: retina, 2.1: cerebellum, 2.2: hippocampus, 2.3: cortex, 3.1: cerebellum, 3.2: hippocampus, 3.3: hippocampus.

## Supplementary Figure 2

MCA branch surface

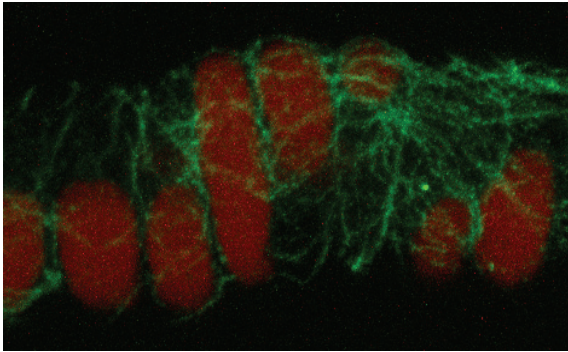

MCA branch cross section

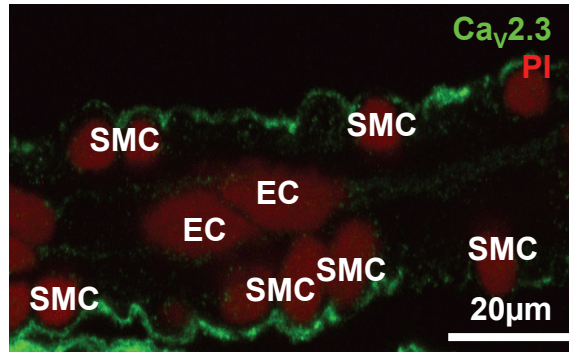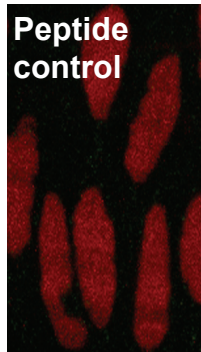

**Supplementary Figure 2: Expression of Ca<sub>v</sub>2.3 in the middle cerebral vessel.** Ca<sub>v</sub>2.3 is limited to the adventitial surface of the vessel, perhaps in association with nerve fibres, and is not associated with either the SMC or EC layers of the vessel. Staining is abolished by preincubation with the immunising peptide.
